# Supplementary material for: The role of low levels of water in the electrochemical oxidation of α-tocopherol (vitamin E) and other phenols in acetonitrile
Source: Royal Society of Chemistry journal article supplement (doi:10.1039/c1cp20579j), 2011-01-01
Supplement: c1cp20579j.pdf [file c1cp20579j.pdf]

## Supplementary Information Section:

# The Role of Low Levels of Water and Hydrogen-Bonding on the Electrochemical Oxidation of $\alpha$ -Tocopherol (Vitamin E) and Other Phenols in Acetonitrile.

Ying Shan Tan, Shanshan Chen, Wan Mei Hong, Jai Min Kan, Edwin Swee Hee Kwek, Shi Yu Lim,  
Zhen Hui Lim, Malcolm E. Tessensohn, Yinlu Zhang and Richard D. Webster\*

Division of Chemistry and Biological Chemistry, School of Physical and Mathematical Sciences,  
Nanyang Technological University, Singapore 637371.

\*E-mail: [webster@ntu.edu.sg](mailto:webster@ntu.edu.sg); Telephone: +65 6316 8793; Fax: +65 6791 1961

---

## CONTENTS

- Page S2.** *Figures S1.* CV and digital simulations of  $\alpha$ -TOH in CH<sub>3</sub>CN with 0.013 M H<sub>2</sub>O.
- Page S3.** *Figures S2.* CV and digital simulations of  $\alpha$ -TOH in CH<sub>3</sub>CN with 0.123 M H<sub>2</sub>O.
- Page S4.** *Figures S3.* CV and digital simulations of  $\alpha$ -TOH in CH<sub>3</sub>CN with 0.233 M H<sub>2</sub>O.
- Page S5.** *Figures S4.* CV and digital simulations of  $\alpha$ -TOH in CH<sub>3</sub>CN with 0.343 M H<sub>2</sub>O.
- Page S6.** *Figures S5.* CV and digital simulations of  $\alpha$ -TOH in CH<sub>3</sub>CN with 0.453 M H<sub>2</sub>O.
- Page S7.** *Figures S6.* CV and digital simulations of  $\alpha$ -TOH in CH<sub>3</sub>CN with 0.563 M H<sub>2</sub>O.
- Page S8.** *Figures S7.* 400-MHz <sup>1</sup>H NMR spectra of 80 mM  $\alpha$ -TOH in dried CD<sub>3</sub>CN with different ratios of D<sub>2</sub>O.
- Page S9.** *Figures S8.* 400-MHz <sup>1</sup>H NMR spectra of 80 mM  $\alpha$ -TOH in dried CD<sub>3</sub>CN with different ratios of DMSO.
- Page S10.** *Figures S9.* 400-MHz <sup>1</sup>H NMR spectra of 80 mM  $\alpha$ -TOH in dried CD<sub>3</sub>CN with different ratios of pyridine.

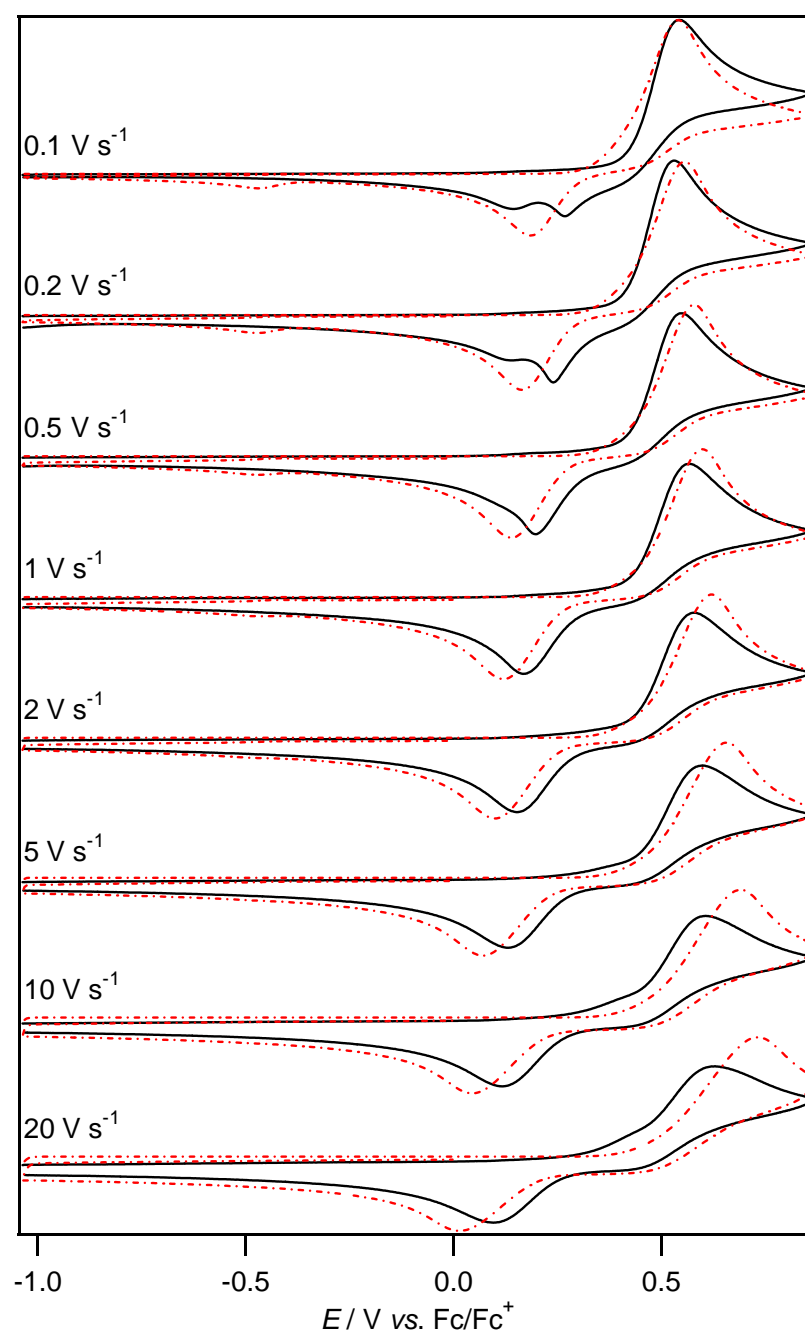

**Figure S1.** (—) Experimental CVs of  $2 \times 10^{-3}$  M  $\alpha$ -TOH in  $\text{CH}_3\text{CN}$  (with 0.013 M  $\text{H}_2\text{O}$ ) containing 0.2 M  $\text{Bu}_4\text{NPF}_6$  at  $22 \pm 2$  °C recorded at a 1 mm diameter Pt electrode at varying scan rates ( $\nu$ ). Positive current is in the upwards direction. Current data were scaled by multiplying by  $\nu^{-0.5}$ . The starting potential is  $-1$  V vs.  $\text{Fc/Fc}^+$  and the finishing potential is 0 V vs.  $\text{Fc/Fc}^+$  on the second scan. (---) Digital simulations of experimental data according to the mechanism in Scheme 2 and parameters in Tables 2 and 3.

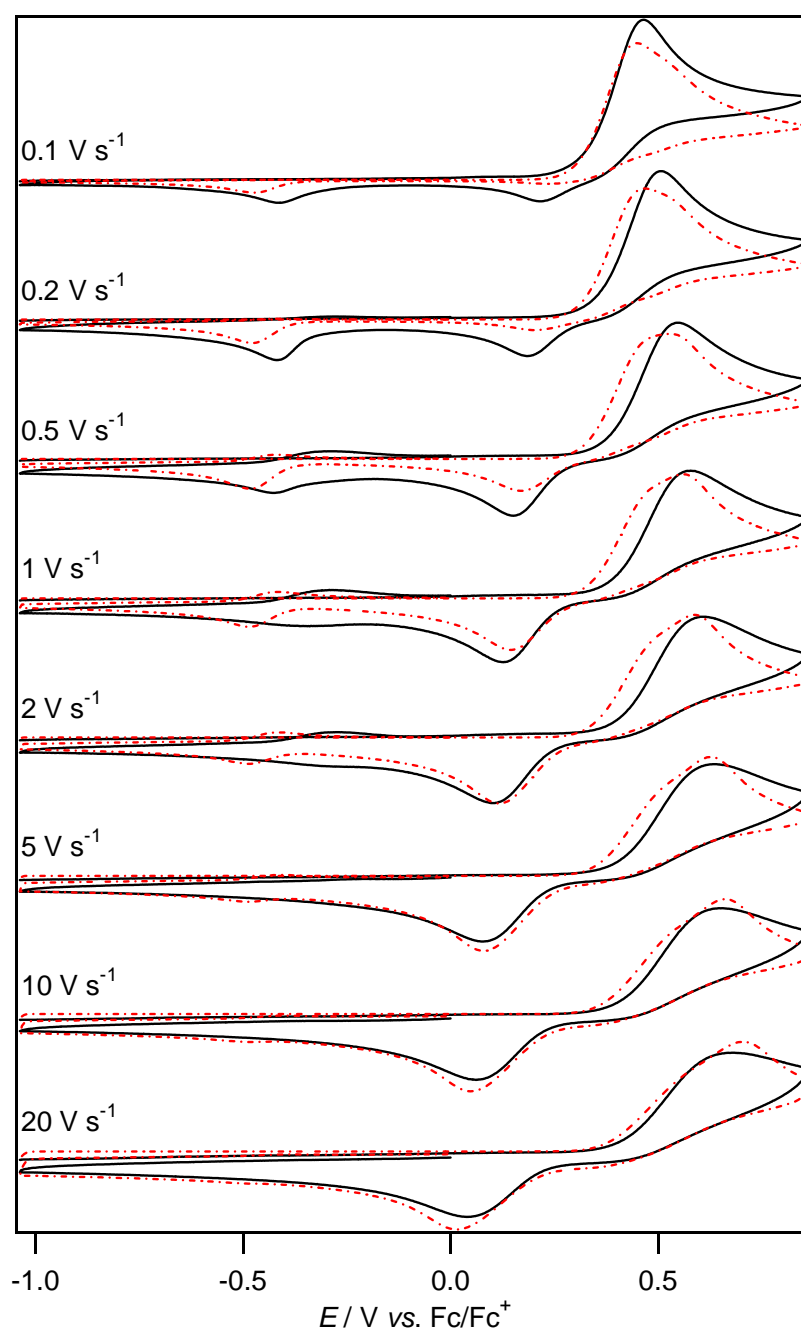

**Figure S2.** (—) Experimental CVs of  $2 \times 10^{-3} \text{ M}$   $\alpha$ -TOH in  $\text{CH}_3\text{CN}$  (with  $0.123 \text{ M H}_2\text{O}$ ) containing  $0.2 \text{ M Bu}_4\text{NPF}_6$  at  $22 \pm 2 \text{ }^\circ\text{C}$  recorded at a  $1 \text{ mm}$  diameter Pt electrode at varying scan rates ( $\nu$ ). Positive current is in the upwards direction. Current data were scaled by multiplying by  $\nu^{-0.5}$ . The starting potential is  $-1 \text{ V vs. Fc/Fc}^+$  and the finishing potential is  $0 \text{ V vs. Fc/Fc}^+$  on the second scan. (---) Digital simulations of experimental data according to the mechanism in Scheme 2 and parameters in Tables 2 and 3.

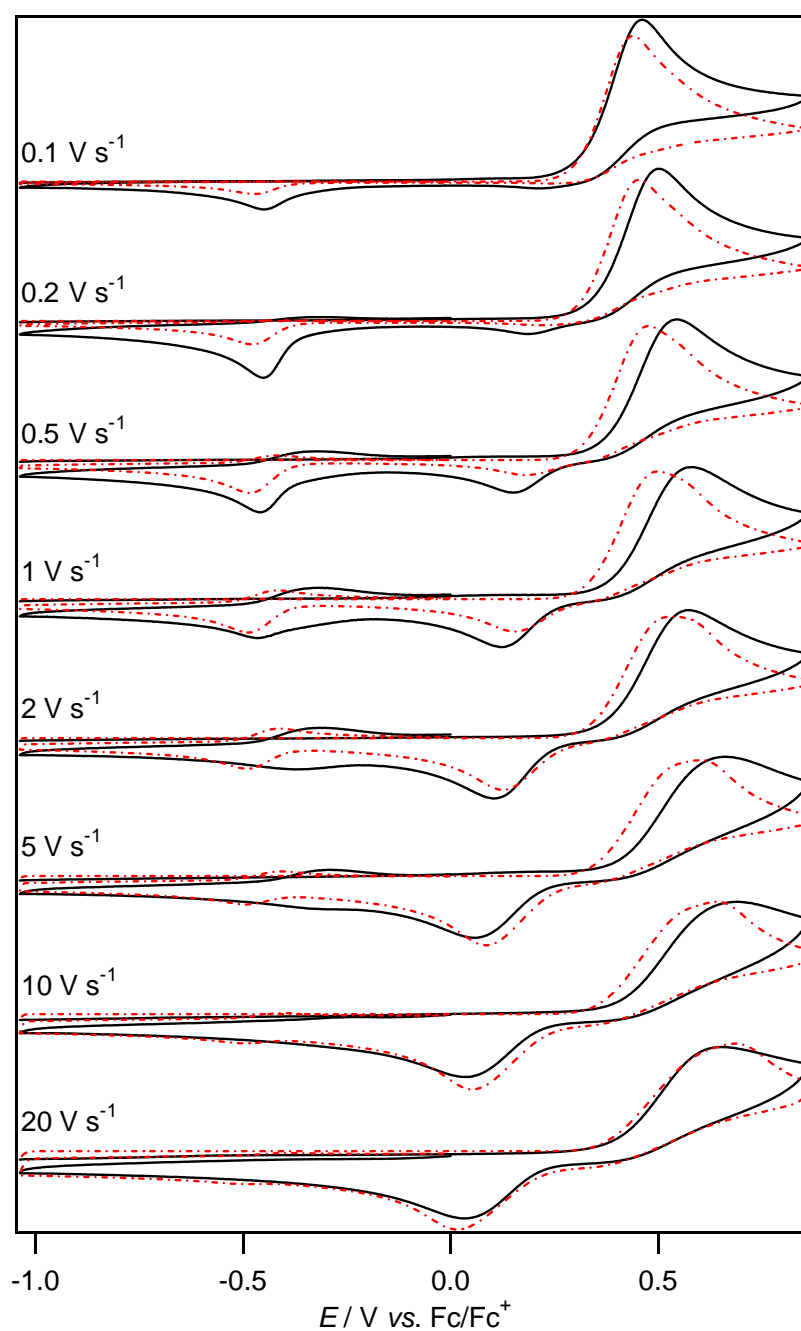

**Figure S3.** (—) Experimental CVs of  $2 \times 10^{-3} \text{ M } \alpha\text{-TOH}$  in  $\text{CH}_3\text{CN}$  (with  $0.233 \text{ M H}_2\text{O}$ ) containing  $0.2 \text{ M Bu}_4\text{NPF}_6$  at  $22 \pm 2 \text{ }^\circ\text{C}$  recorded at a  $1 \text{ mm}$  diameter Pt electrode at varying scan rates ( $\nu$ ). Positive current is in the upwards direction. Current data were scaled by multiplying by  $\nu^{-0.5}$ . The starting potential is  $-1 \text{ V vs. Fc/Fc}^+$  and the finishing potential is  $0 \text{ V vs. Fc/Fc}^+$  on the second scan. (---) Digital simulations of experimental data according to the mechanism in Scheme 2 and parameters in Tables 2 and 3.

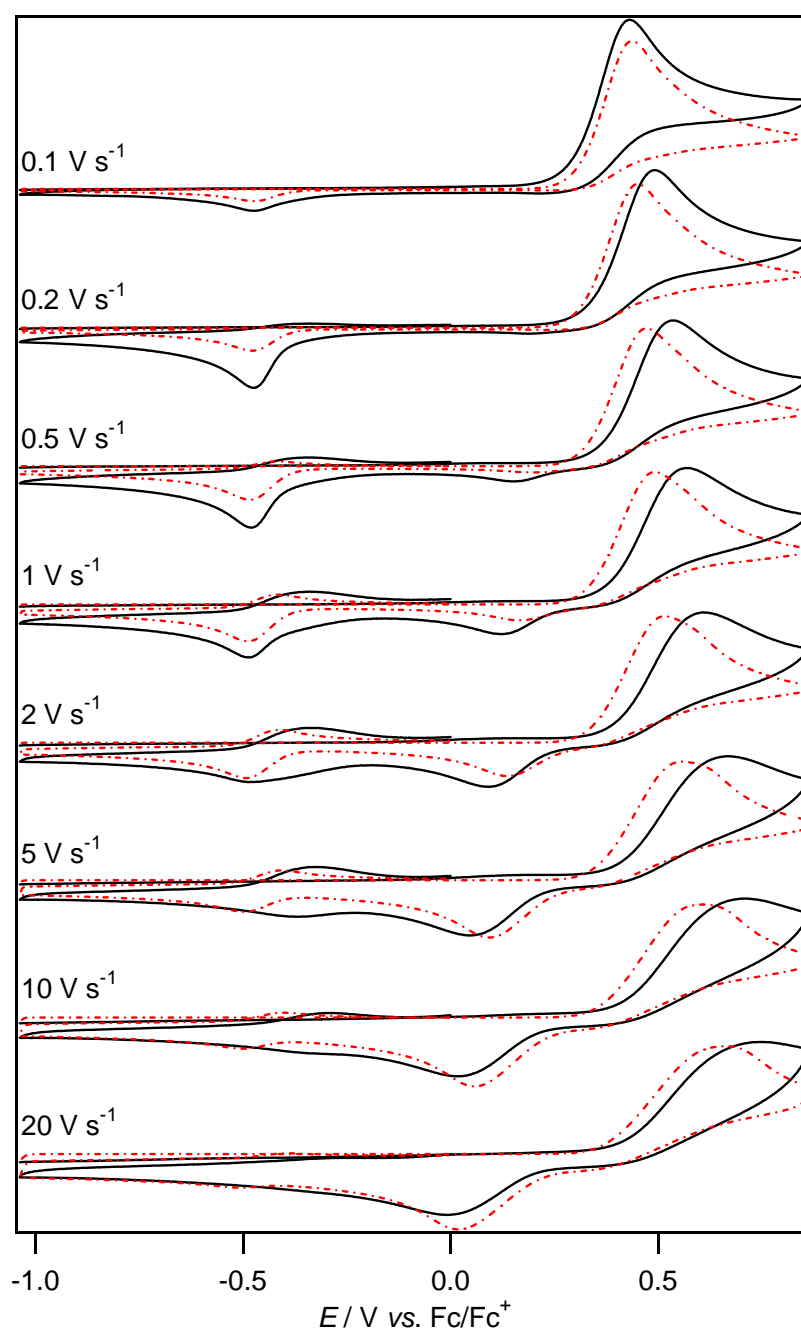

**Figure S4.** (—) Experimental CVs of  $2 \times 10^{-3}$  M  $\alpha$ -TOH in  $CH_3CN$  (with 0.343 M  $H_2O$ ) containing 0.2 M  $Bu_4NPF_6$  at  $22 \pm 2$  °C recorded at a 1 mm diameter Pt electrode at varying scan rates ( $\nu$ ). Positive current is in the upwards direction. Current data were scaled by multiplying by  $\nu^{-0.5}$ . The starting potential is  $-1$  V vs.  $Fc/Fc^+$  and the finishing potential is 0 V vs.  $Fc/Fc^+$  on the second scan. (---) Digital simulations of experimental data according to the mechanism in Scheme 2 and parameters in Tables 2 and 3.

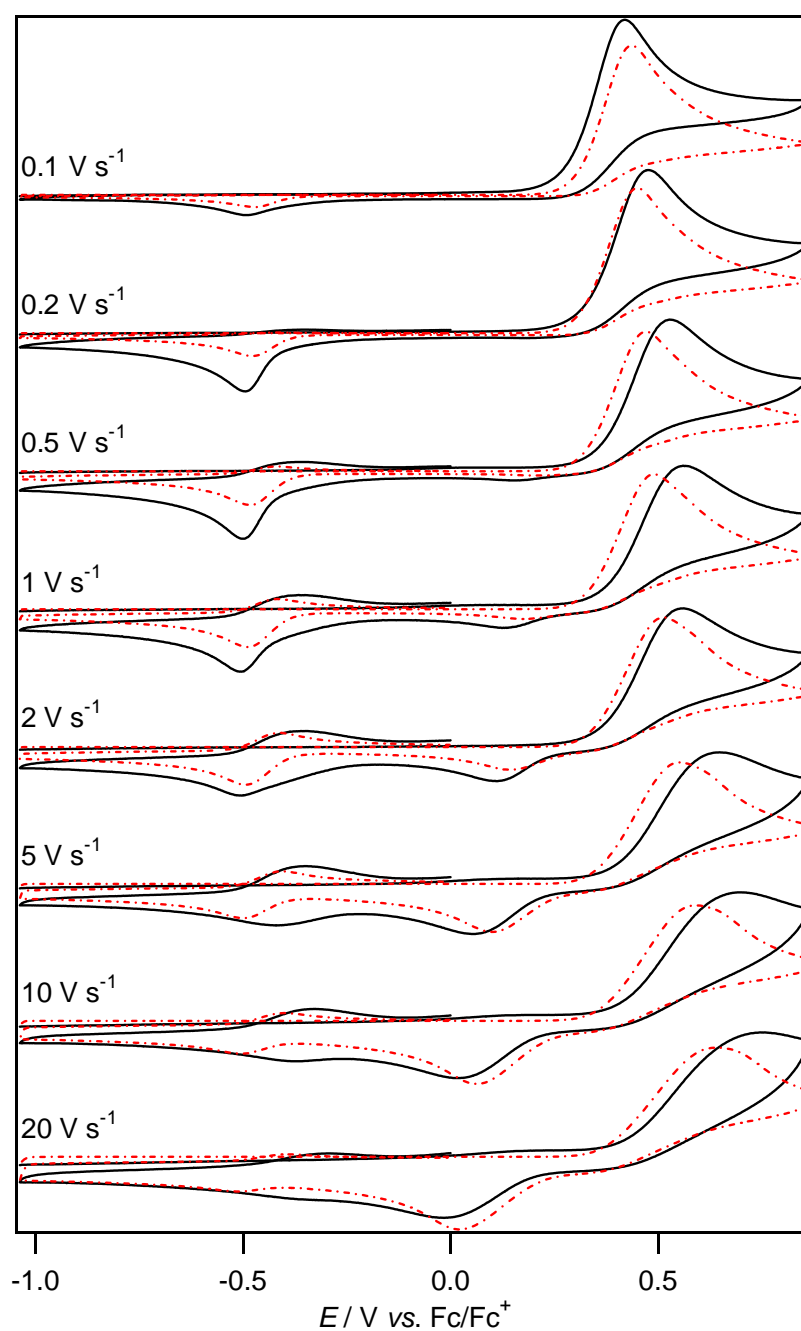

**Figure S5.** (—) Experimental CVs of  $2 \times 10^{-3}$  M  $\alpha$ -TOH in  $\text{CH}_3\text{CN}$  (with 0.453 M  $\text{H}_2\text{O}$ ) containing 0.2 M  $\text{Bu}_4\text{NPF}_6$  at  $22 \pm 2$  °C recorded at a 1 mm diameter Pt electrode at varying scan rates ( $\nu$ ). Positive current is in the upwards direction. Current data were scaled by multiplying by  $\nu^{-0.5}$ . The starting potential is  $-1$  V vs.  $\text{Fc}/\text{Fc}^+$  and the finishing potential is 0 V vs.  $\text{Fc}/\text{Fc}^+$  on the second scan. (---) Digital simulations of experimental data according to the mechanism in Scheme 2 and parameters in Tables 2 and 3.

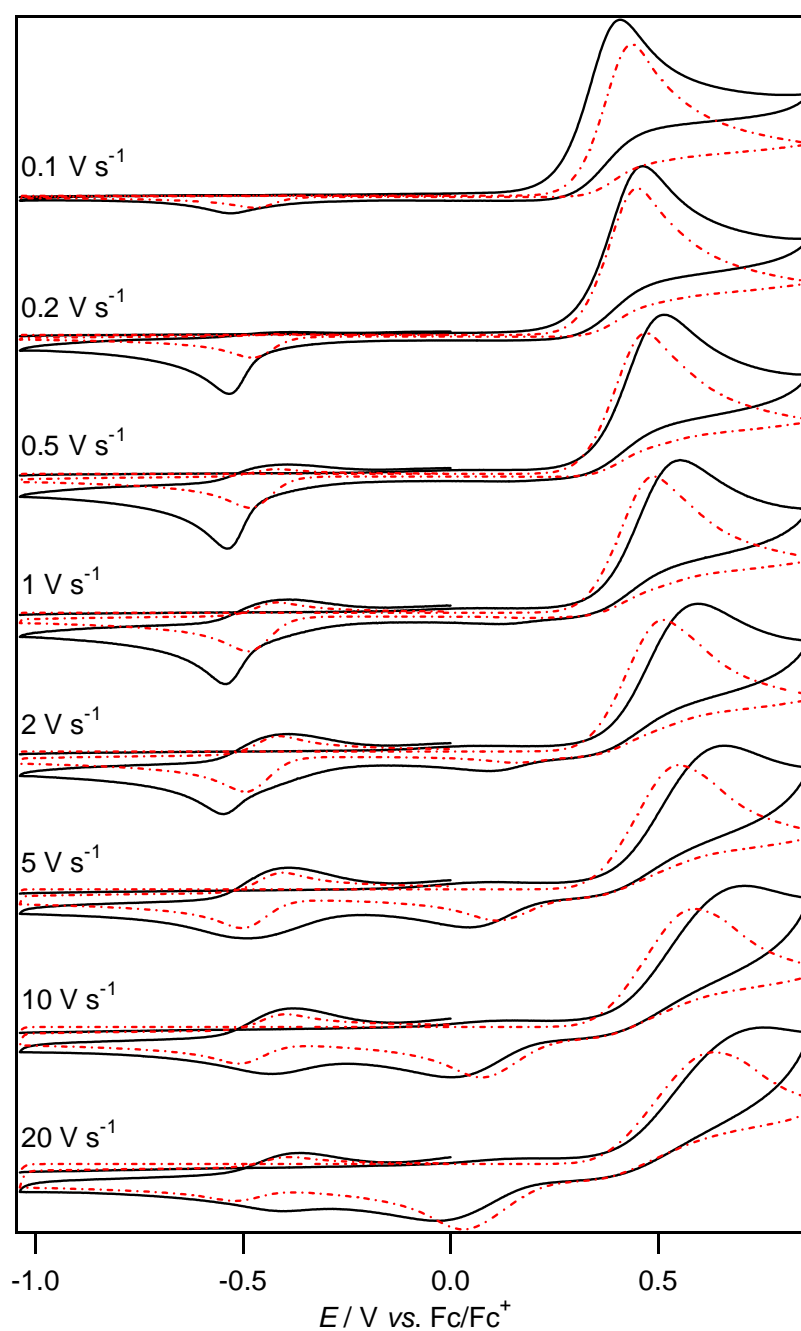

**Figure S6.** (—) Experimental CVs of  $2 \times 10^{-3}$  M  $\alpha$ -TOH in  $CH_3CN$  (with 0.563 M  $H_2O$ ) containing 0.2 M  $Bu_4NPF_6$  at  $22 \pm 2$  °C recorded at a 1 mm diameter Pt electrode at varying scan rates ( $\nu$ ). Positive current is in the upwards direction. Current data were scaled by multiplying by  $\nu^{-0.5}$ . The starting potential is  $-1$  V vs.  $Fc/Fc^+$  and the finishing potential is 0 V vs.  $Fc/Fc^+$  on the second scan. (---) Digital simulations of experimental data according to the mechanism in Scheme 2 and parameters in Tables 2 and 3.

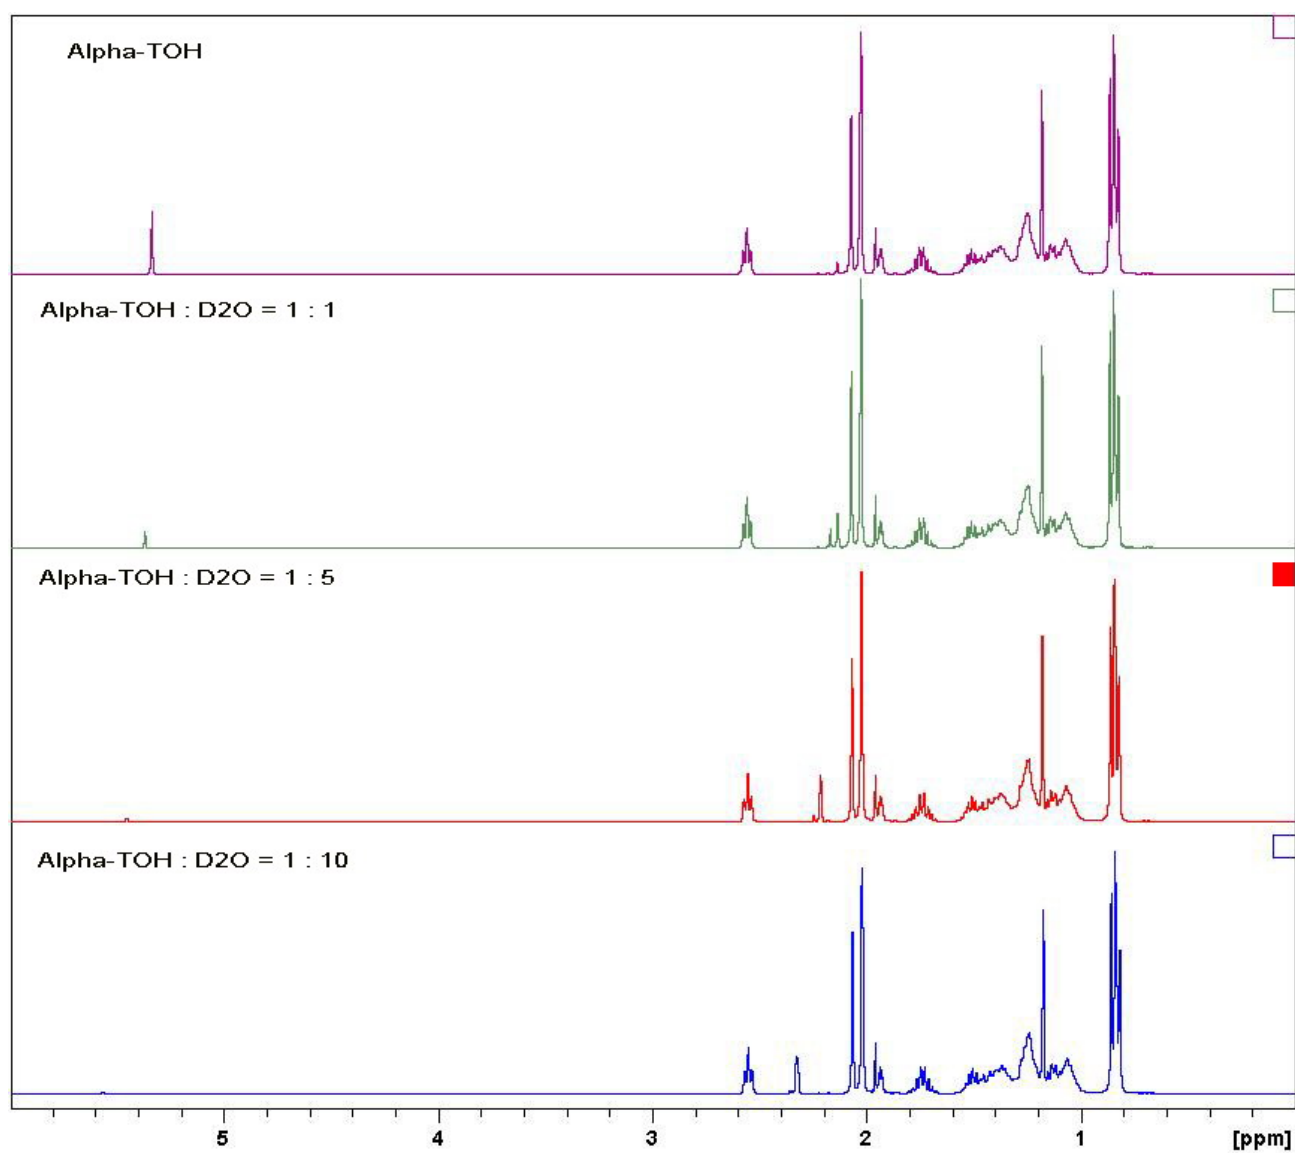

**Figure S7.** 400-MHz <sup>1</sup>H NMR spectra of 80 mM α-TOH in dried CD<sub>3</sub>CN with different ratios of D<sub>2</sub>O.



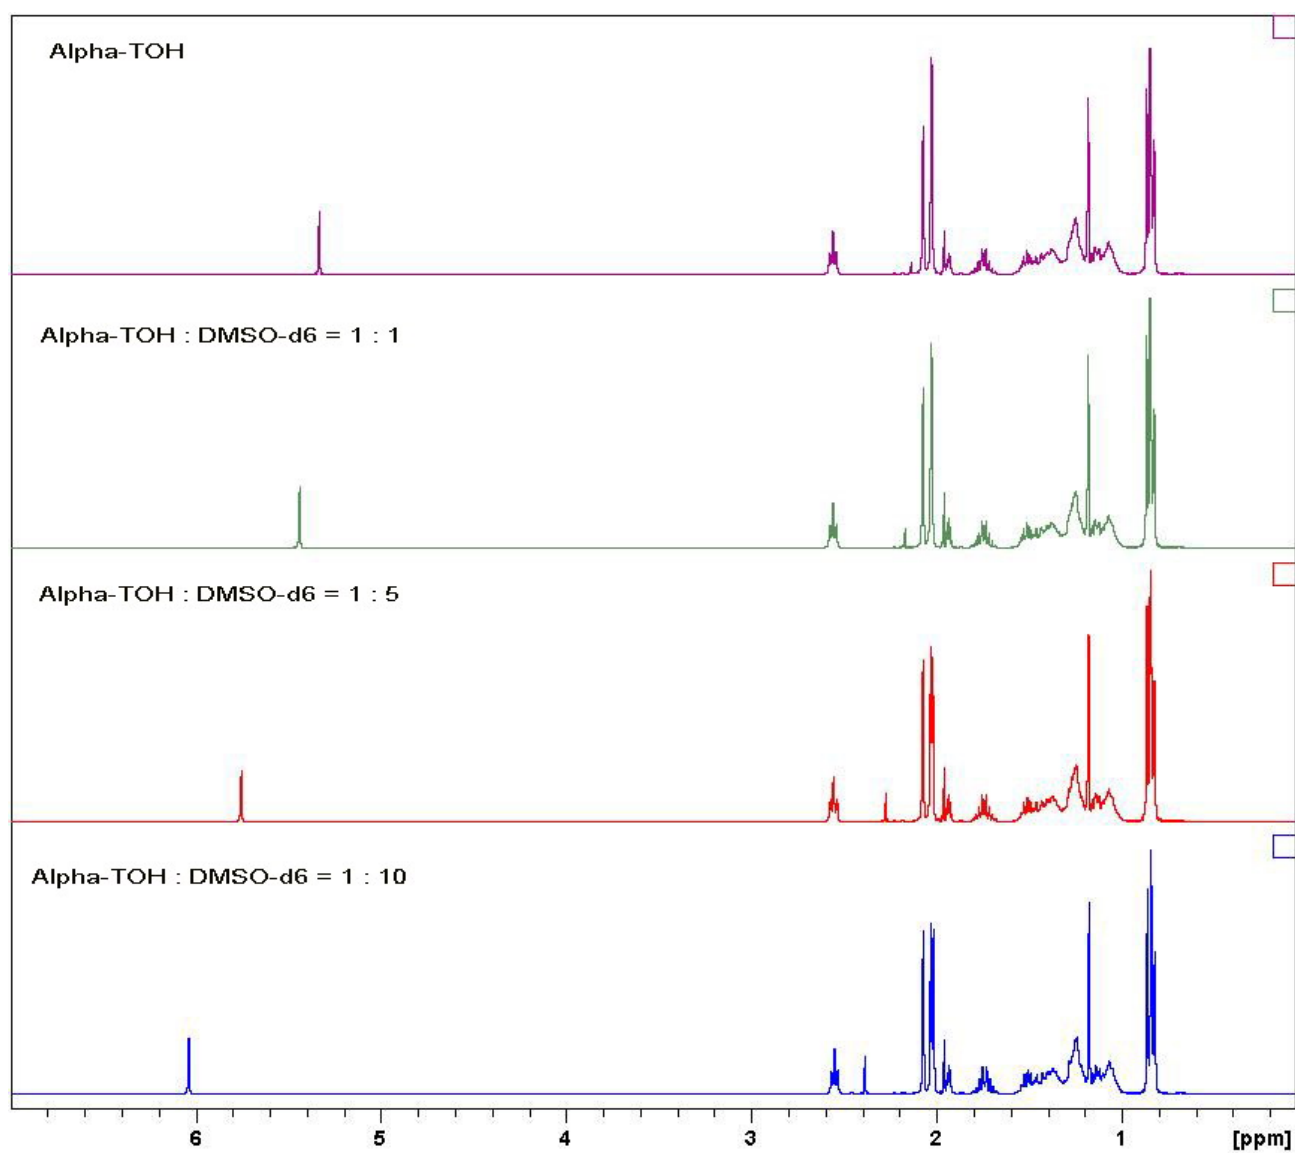

**Figure S8.** 400-MHz <sup>1</sup>H NMR spectra of 80 mM α-TOH in dried CD<sub>3</sub>CN with different ratios of DMSO.

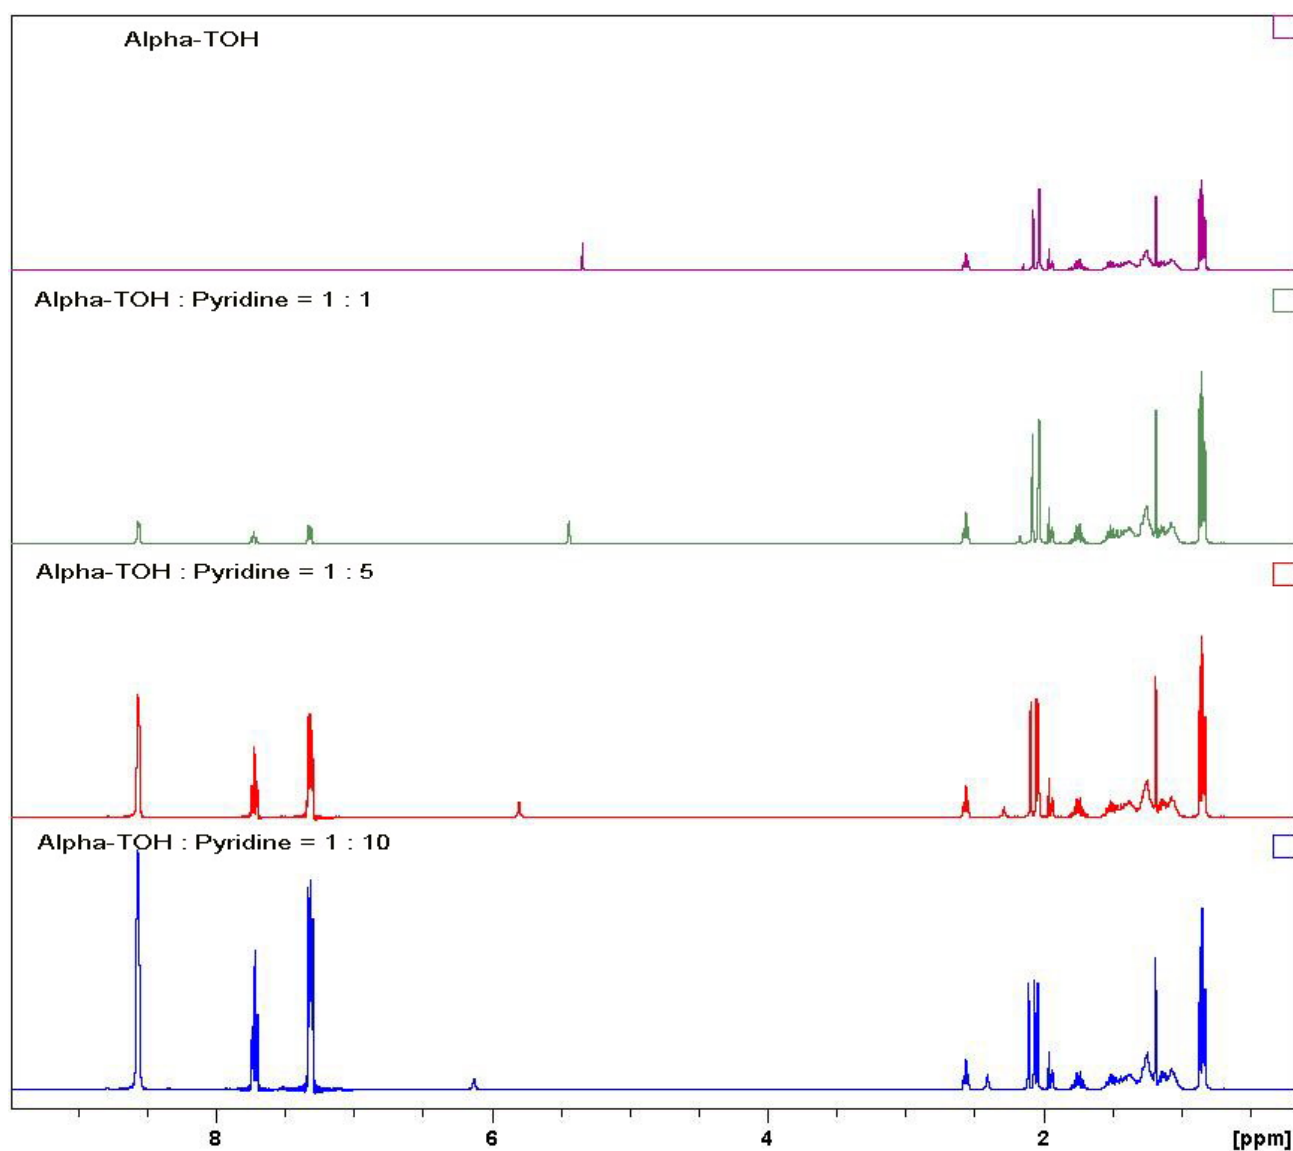

**Figure S9.** 400-MHz <sup>1</sup>H NMR spectra of 80 mM α-TOH in dried CD<sub>3</sub>CN with different ratios of pyridine.
